# Supplementary material for: An intraspecies Leishmania donovani hybrid from the Indian subcontinent is associated with an atypical phenotype of cutaneous disease
Source: PubMed Central journal article supplement — iScience. 2022 Jan 22;25(2):103802. doi: 10.1016/j.isci.2022.103802 (PMC8841885; doi:10.1016/j.isci.2022.103802), 2022-01-22
Supplement: mmc1.pdf [file mmc1.pdf]

iScience, Volume 25

## Supplemental information

**An intraspecies *Leishmania donovani*  
hybrid from the Indian subcontinent is associated  
with an atypical phenotype of cutaneous disease**

**Patrick Lypaczewski, Lovlesh Thakur, Aklank Jain, Sandhya Kumari, Kayla Paulini, Greg Matlashewski, and Manju Jain**

**A**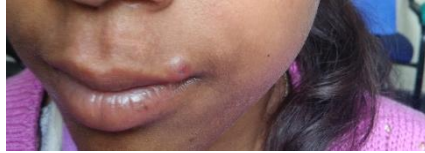

|                        |                                   |
|------------------------|-----------------------------------|
| Age and sex            | 12 yrs Female                     |
| Residence              | Rampur, Shimla, Himachal Pradesh  |
| Travel history         | No travel history outside HP      |
| # of lesions           | 1 (Left side of upper lip)        |
| Size of lesion         | 1x1 cm                            |
| Lesion duration        | 3 months at the time of diagnosis |
| Lesion characteristics | Erythematous elevated papule      |

**B**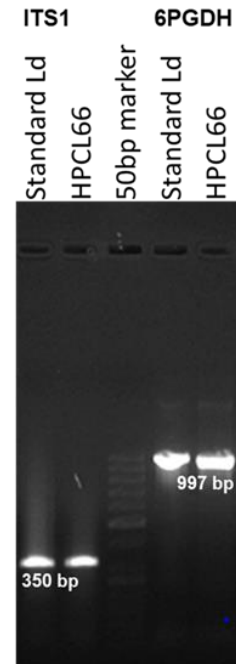

**Figure S1. Clinical and Molecular characteristics of HPCL66 isolate.** Related to STAR methods. **A.** CL patient HPCL66 with the baseline characteristics. **B.** ITS1 PCR (Left) and 6PGDH PCR (Right) amplification for sequence-based identification of the parasite from the CL patient, HPCL66 along with the standard *L. donovani* (LdBob 1S2D) as a positive control

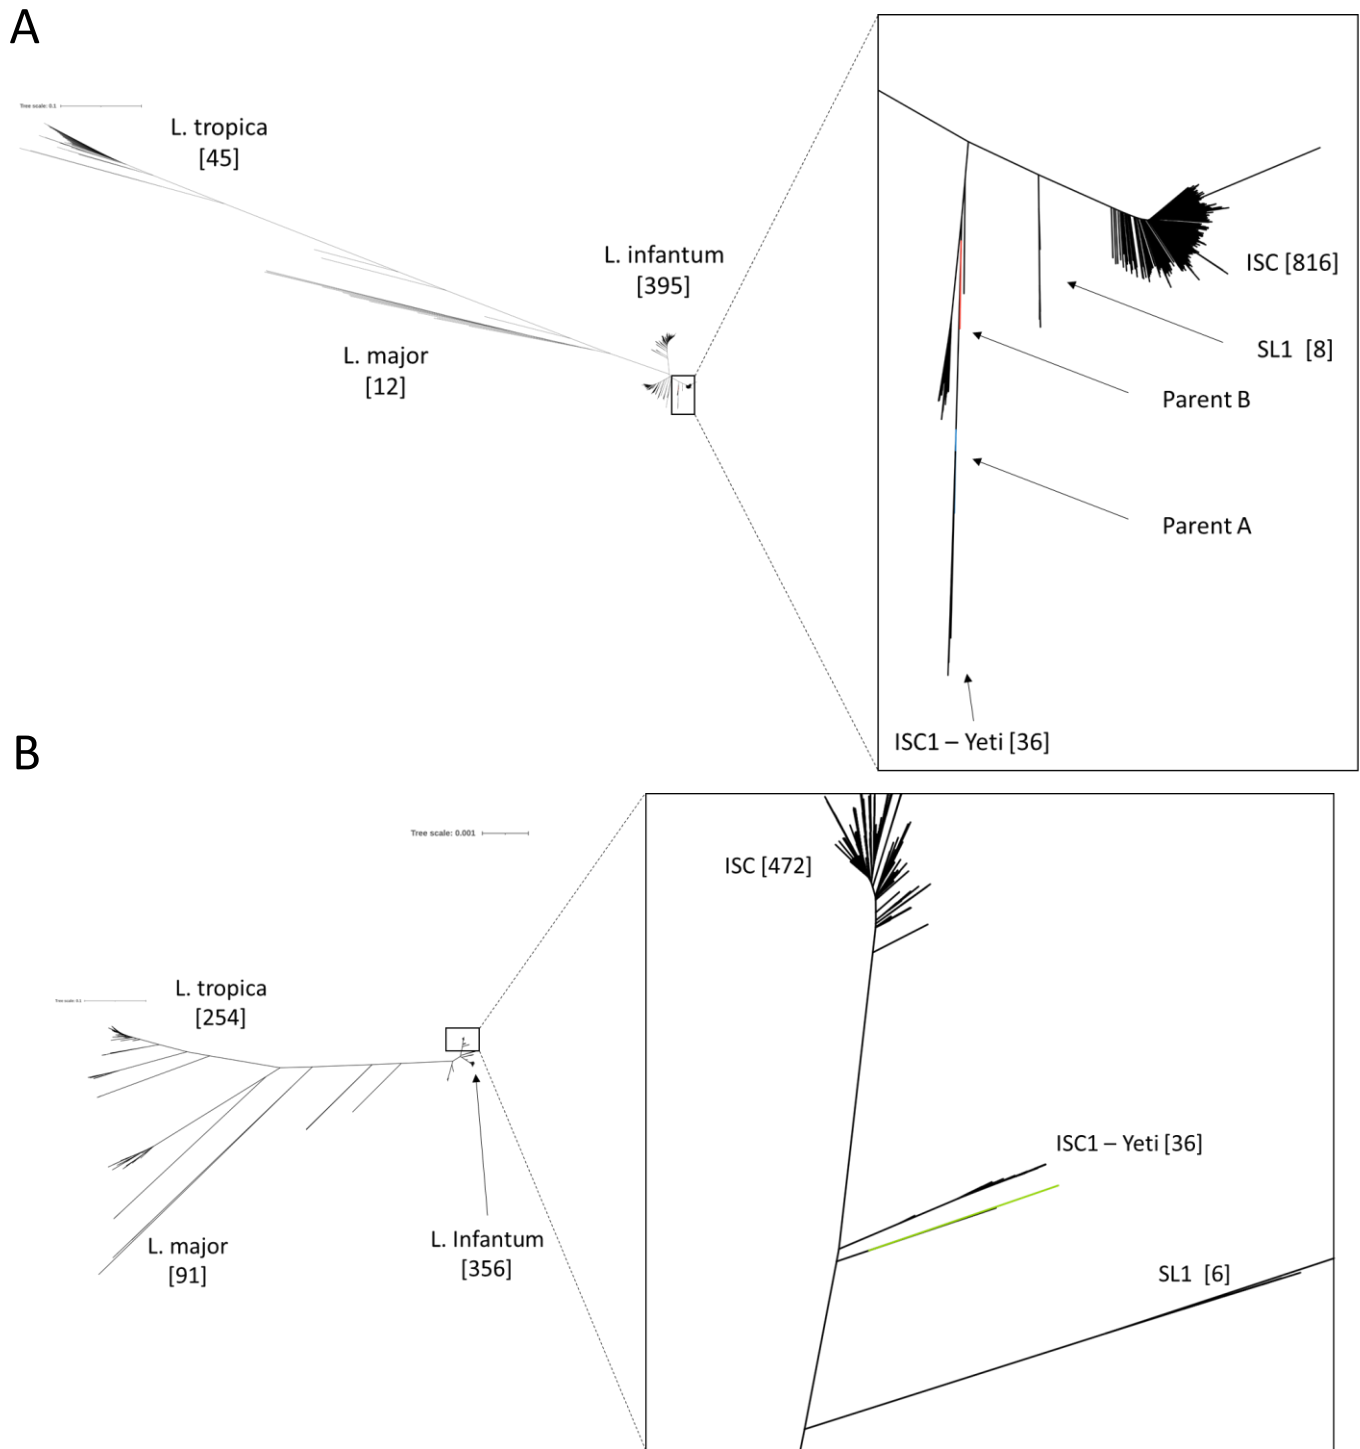

**Figure S2. Parental reconstruction phylogeny.** Related to Figure 3. **A.** Phylogenetic analysis of Chromosome 1 following frequency-based haplotype segregation into two separate parental haplotypes (colored in blue and red). Both phased haplotypes fall within the ISC1 group and remain unique from all previously sequenced isolates. **B.** Phylogenetic analysis using the core kDNA region sequence alignments. The parental LdHP isolate is highlighted in green and is placed within the ISC1 group.
